# Supplementary material
Source: publisher figshare collection journal article supplement (https://brill.figshare.com/articles/dataset/_/21184501)
Supplement: Supplementary file 1 [file 1]

## ASSESSMENT OF FARMED CATTLE WELFARE IN CHITWAN DISTRICT

*All the information provided by the respondent will be maintained confidential.*

### **Section: 1 Socio-demographic information of farm owners**

Name of the Farm: ..... Farm code: .....

Area of the Farm: ..... Year of establishment=.....

Name of respondent: ..... Gender:.....

Address: ..... Contact no: .....

Age of respondent:      1) 18-25;      2) 26-35;      3)36-45;      4)46-55

### **Section 2: Calf rearing**

1. Breed of calves: .....

2. Total number of calves born on-farm =.....

Male=

Female=

3. Current status (fate) of female calves born on-farm=  .....

(1= reared at farm, purpose?

2= sold,

3=died, how?

4=given away,

5=others, specify

6=No comments)

4. Current status (fate) of male calves born on-farm=  .....

(1= reared at farm, purpose?

2= sold,

3=died, how?

4=given away,

5=others, specify

6=No comments)

5. What are you planning to do with the male calves?.....  
.....

6. Have you ever heard of ill practices regarding rearing of male calves? (check-in boxes)

• Gradual feed withdrawal ☐

• Forced feeding ☐

• Handed over to be crossed river and into forest area ☐

7. Have you ever witnessed your neighbor doing such acts?  ( 1= Yes, 2= No)

If yes, specify =.....
