# Supplementary material
Source: publisher figshare collection journal article supplement (https://brill.figshare.com/articles/dataset/_/21184501)
Supplement: Supplementary file 2 [file 1]

***Short Communication***

**Animal Welfare Issues Associated with  
Rearing Dairy Calves in Nepalese Context**

*Nirvay Sah* | ORCID: 0000-0002-2788-3646

Corresponding author,

Institute of Agriculture and Animal Science, Tribhuvan  
University, Kathmandu, Nepal

Current affiliation: Department of Animal Science, Texas  
A&M University, College Station, TX 77843, USA

*nsah@tamu.edu*

*Krishna Kafle*

Institute of Agriculture and Animal Science, Tribhuvan  
University, Kathmandu, Nepal

*krishnakaphledr@gmail.com*

*Sushil Paudyal* | ORCID: 0000-0002-6388-921X

Corresponding author,

Institute of Agriculture and Animal Science, Tribhuvan  
University, Kathmandu, Nepal

Current affiliation: Department of Animal Science, Texas  
A&M University, College Station, TX 77843, USA  
*sushilpaudyal@tamu.edu*

*Sanjeev Wasti* | ORCID: 0000-0003-0393-6229

Institute of Agriculture and Animal Science, Tribhuvan  
University, Kathmandu, Nepal

Current affiliation: Department of Animal Science, Cornell  
University, Ithaca, NY 14853-4801, USA  
*sanjeevwasti0@gmail.com*

*Ganga K. Sah*

Institute of Agriculture and Animal Science, Tribhuvan  
University, Kathmandu, Nepal

Current affiliation: Department of Food Science and  
Technology, Texas A&M University, College Station, TX  
77843-2256 USA  
*sahganga92@gmail.com*

**Supplementary Material**
